# Supplementary material for: Colonization of Dental Unit Waterlines by Helicobacter pylori: Risk of Exposure in Dental Practices
Source: MDPI journal article supplement (doi:10.3390/ijerph16162981), 2019-08-19
Supplement: s1 [file s1]

Record n°      í í í í í í í í í í í

Dental unit (brand / model)      í í í í í í í í í í      installation date      í .í í í í í í í í ...

Main activity (i.e. dental hygiene, conservative, surgery,etc)      ...í .í í í í í í í í í ..í í í ...í

No. of working days per week      í í í í ..í í ..      No. of patients per day      í í í í í í í í ...

The dental unit clinical irrigator for the working handpieces and for the rinsing cup is :

☐ potable water derived from the building's cold water supply

☐ water or other liquid supplied by an independent water reservoir

Is there a system for the softening of the incoming water ?      yes ☐ no ☐

Is the dental unit equipped with a filter for the incoming water?      yes ☐ no ☐

Is sterile water used as a coolant/irrigator when performing surgical procedure?      yes ☐ no ☐

Is there a physical air gap separating DUWLs from the municipal water supply to prevent the back-siphonage of clinical material?      yes ☐ no ☐

Is the dental unit equipped with anti-retraction devices toward the working handpieces (i.e. the high-speed handpiece, air/water syringe , ultrasonic scaler etc)?      yes ☐ no ☐

Is the dental unit equipped with a disinfection system?      yes ☐ no ☐

Is the dental unit disinfected?      yes ☐ no ☐

If yes, with a continue or discontinue system?      í í í í í í í í í í í í í í í í í í í í

In case of continue disinfection which product is used?      í í í í í í í í í ..í í í .í í í í í

at which concentration?      í í í í í í í í í í í í í í í í í í í í í í í í .í .í í í .

In case of discontinue disinfection which product is used?      í í í í í í í í í í í í .í í

with which frequency?      í í í í í í í í í í      at which concentration?      í í .í í í .í í .

and contact time?      í í í í í í í í ...í í ...

Do you disinfected the tubing system that drains liquids off the unit?      yes ☐ no ☐

If yes, with which frequency?      í í í í í í í í í í í í í í í í í í í í í í .

Do you monitor the dental water quality to assess its microbiological composition?      yes ☐ no ☐

If yes, with which frequency?      í í í í í í í í í í í í í í í í í í í í í í í .

Is the dental unit subjected to routine maintenance by the manufacturer?      yes ☐ no ☐

If yes, with which frequency?      í í í í í í í í í í í í í í í í í í í í í í í .
